# Supplementary material for: Effects of Artificial Light at Night (ALAN) on European Hedgehog Activity at Supplementary Feeding Stations
Source: MDPI journal article supplement (doi:10.3390/ani10050768), 2020-04-28
Supplement: s1 [file s1]

## Supplementary material

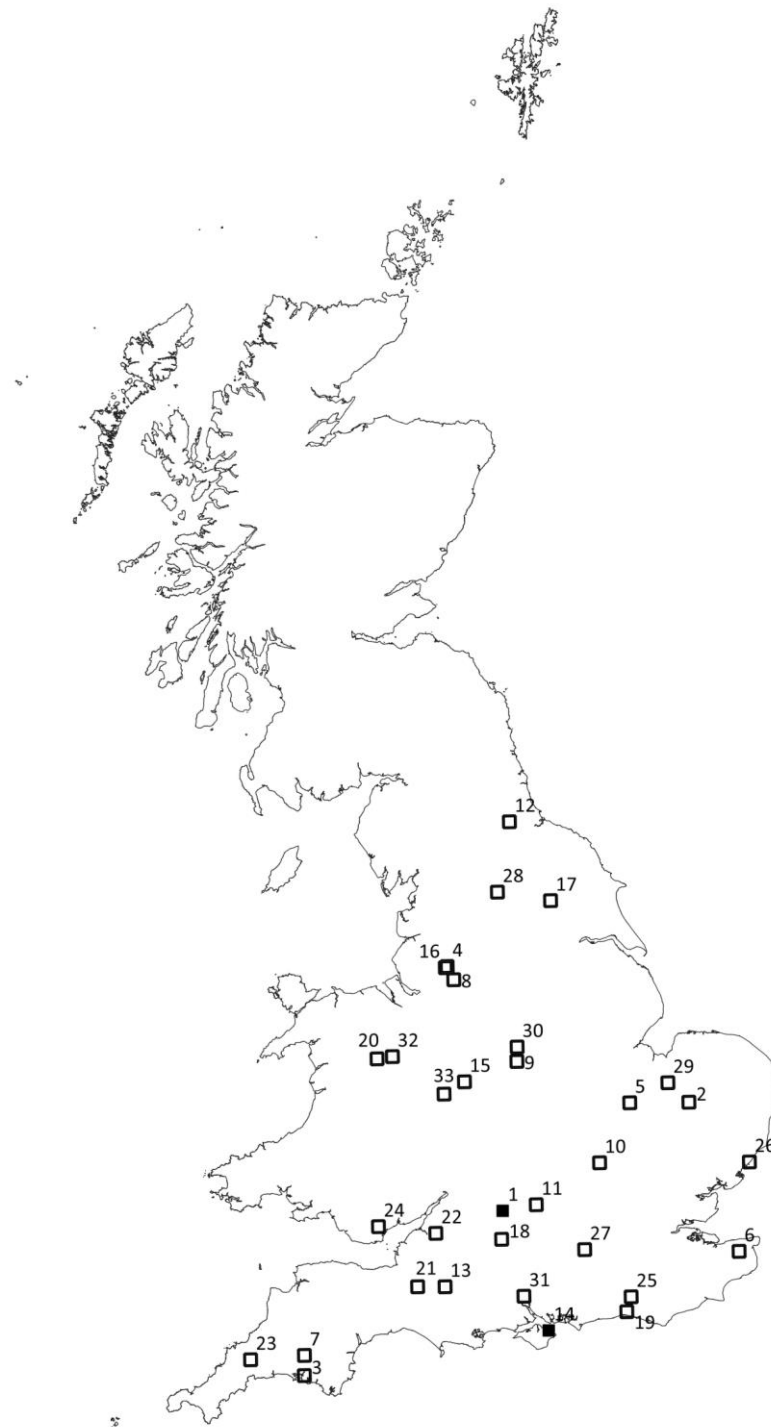

**Figure S1.** The spatial distribution of the 33 project volunteers. The 31 points in white were included in the activity pattern analyses, whereas the two in black were not due to insufficient sample sizes for activity analyses.

**Table S1.** Site-level results of activity pattern analyses giving the sample size (hedgehog records) in both the dark and light treatments, the coefficient of overlap between the two activity patterns ( $\Delta$ ), and the p-value test statistic of the Wald test performed. If  $p < 0.05$  (denoted with \*) then the activity patterns are significantly different between treatments. Activity analyses were not conducted for sites 1 and 14 due to sample sizes of less than 10.

| Site | Dark sightings<br>(n) | Light sightings<br>(n) | Overlap ( $\Delta$ ) | p-value |
|------|-----------------------|------------------------|----------------------|---------|
| 1    | 1                     | 4                      | NA                   | NA      |
| 2    | 53                    | 24                     | 0.52                 | 0.00*   |
| 3    | 200                   | 103                    | 0.90                 | 0.332   |
| 4    | 66                    | 35                     | 0.93                 | 0.779   |
| 5    | 49                    | 79                     | 0.81                 | 0.07    |
| 6    | 69                    | 67                     | 0.84                 | 0.068   |
| 7    | 36                    | 26                     | 0.73                 | 0.007*  |
| 8    | 15                    | 16                     | 0.75                 | 0.213   |
| 9    | 77                    | 79                     | 0.85                 | 0.083   |
| 10   | 52                    | 70                     | 0.80                 | 0.034*  |
| 11   | 124                   | 101                    | 0.77                 | 0.001*  |
| 12   | 108                   | 132                    | 0.87                 | 0.119   |
| 13   | 29                    | 53                     | 0.68                 | 0.009*  |
| 14   | 8                     | 2                      | NA                   | NA      |
| 15   | 18                    | 15                     | 0.77                 | 0.248   |
| 16   | 95                    | 73                     | 0.75                 | 0.00*   |
| 17   | 52                    | 46                     | 0.92                 | 0.804   |
| 18   | 55                    | 234                    | 0.67                 | 0.00*   |
| 19   | 38                    | 26                     | 0.92                 | 0.812   |
| 20   | 41                    | 42                     | 0.89                 | 0.427   |
| 21   | 13                    | 19                     | 0.85                 | 0.536   |
| 22   | 22                    | 18                     | 0.90                 | 0.686   |
| 23   | 30                    | 26                     | 0.70                 | 0.023*  |
| 24   | 61                    | 48                     | 0.74                 | 0.017*  |
| 25   | 131                   | 67                     | 0.88                 | 0.203   |
| 26   | 101                   | 87                     | 0.74                 | 0.002*  |
| 27   | 104                   | 161                    | 0.93                 | 0.629   |
| 28   | 268                   | 187                    | 0.86                 | 0.001*  |

|    |     |     |      |       |
|----|-----|-----|------|-------|
| 29 | 122 | 193 | 0.77 | 0.00* |
| 30 | 57  | 71  | 0.89 | 0.367 |
| 31 | 124 | 70  | 0.95 | 0.884 |
| 32 | 57  | 79  | 0.88 | 0.461 |
| 33 | 80  | 87  | 0.64 | 0.00* |

---

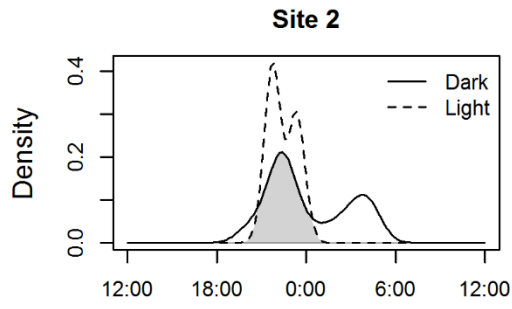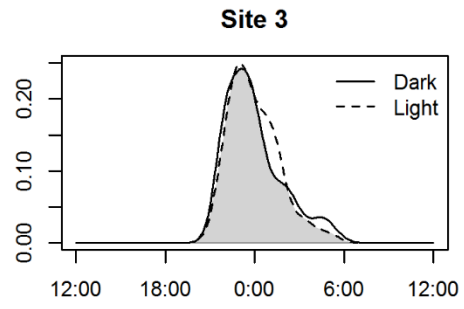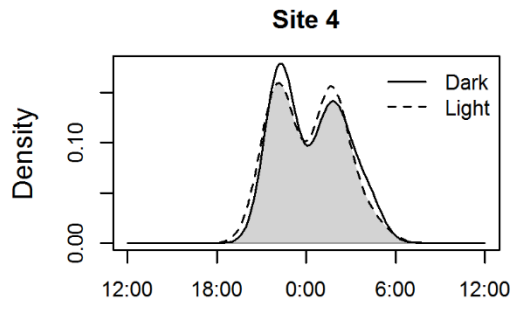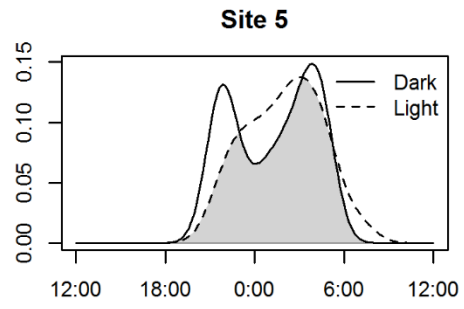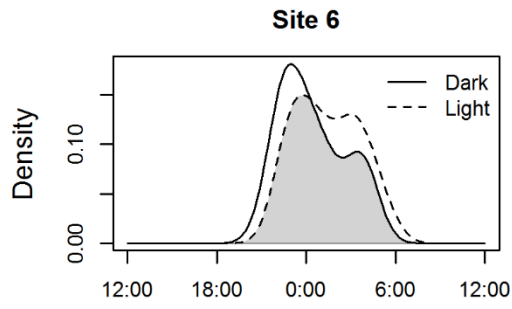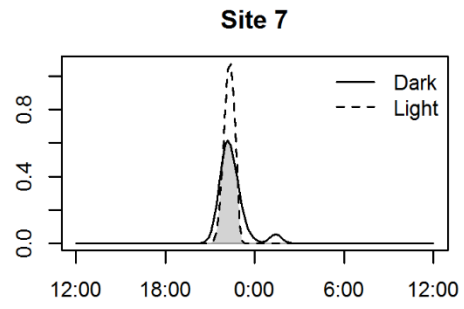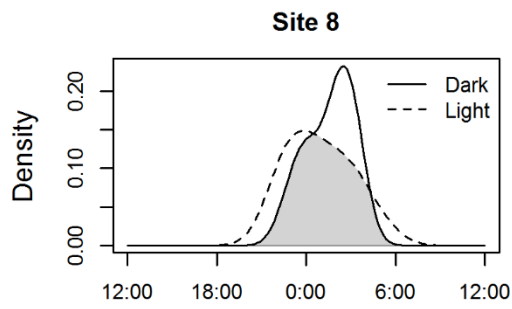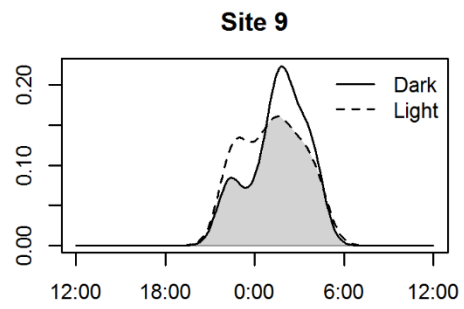

Time

Time

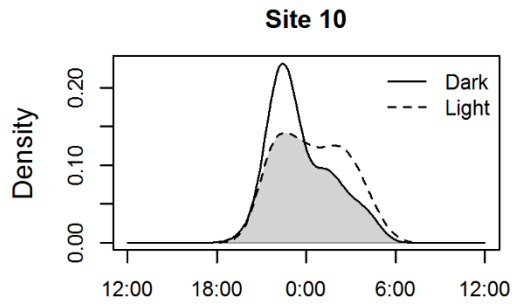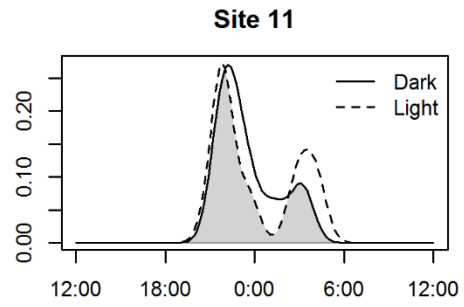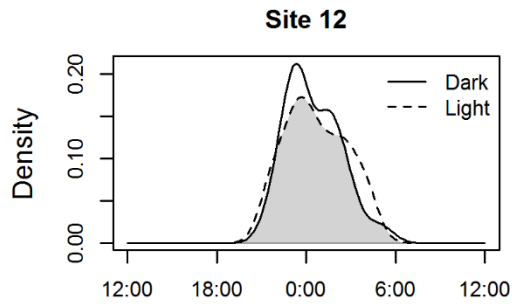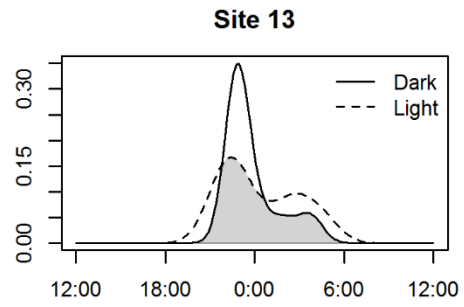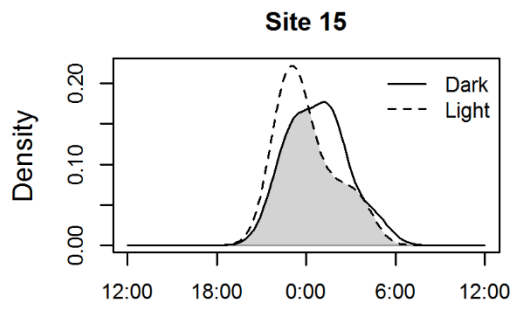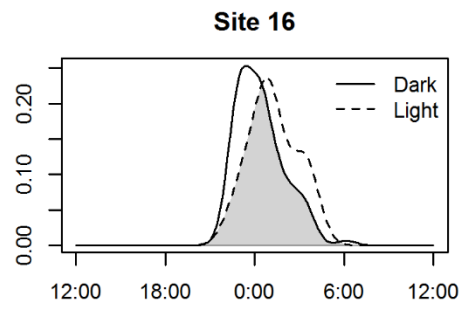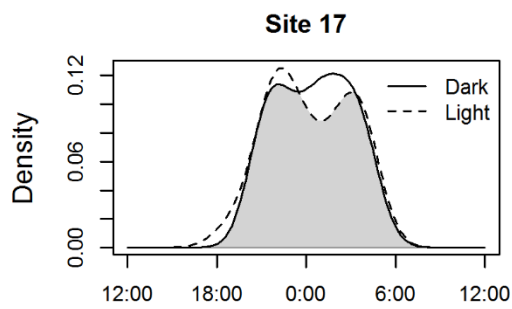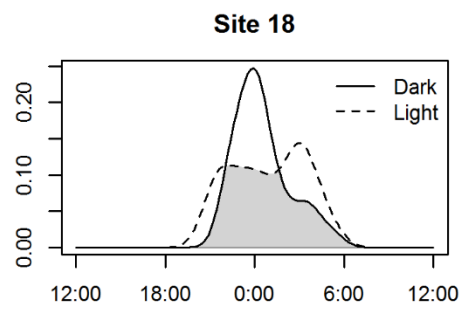

Time

Time

**Site 19**

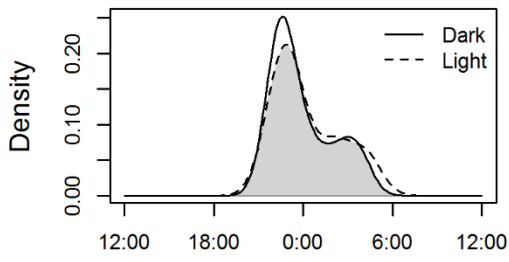

**Site 20**

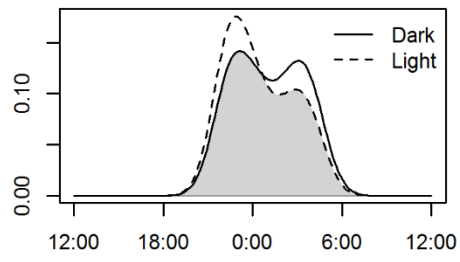

**Site 21**

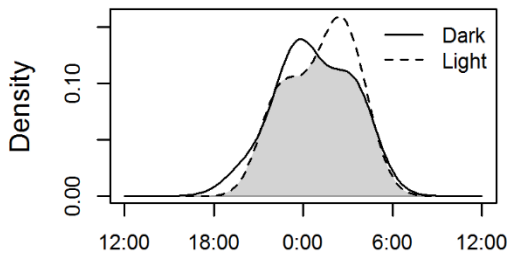

**Site 22**

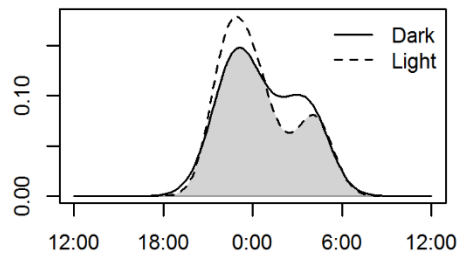

**Site 23**

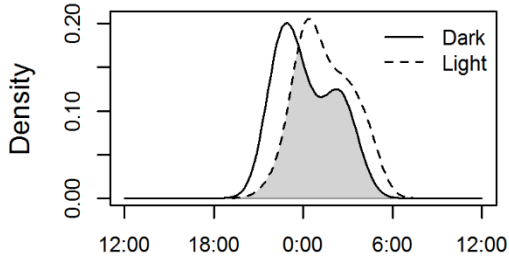

**Site 24**

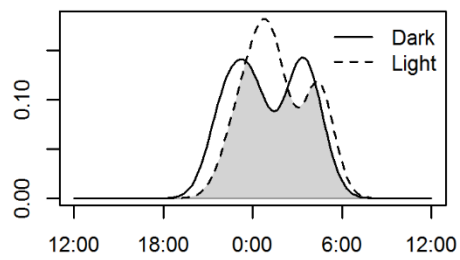

**Site 25**

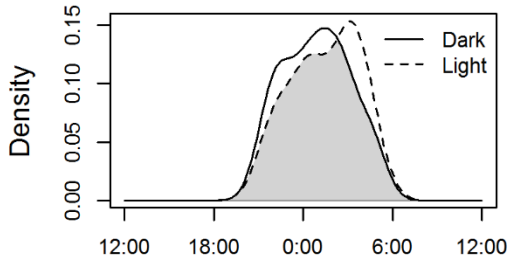

**Site 26**

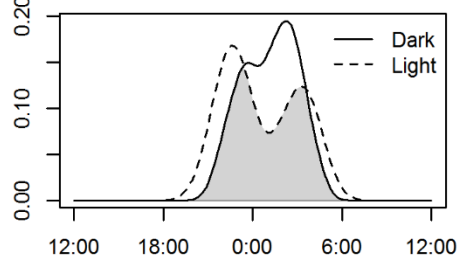

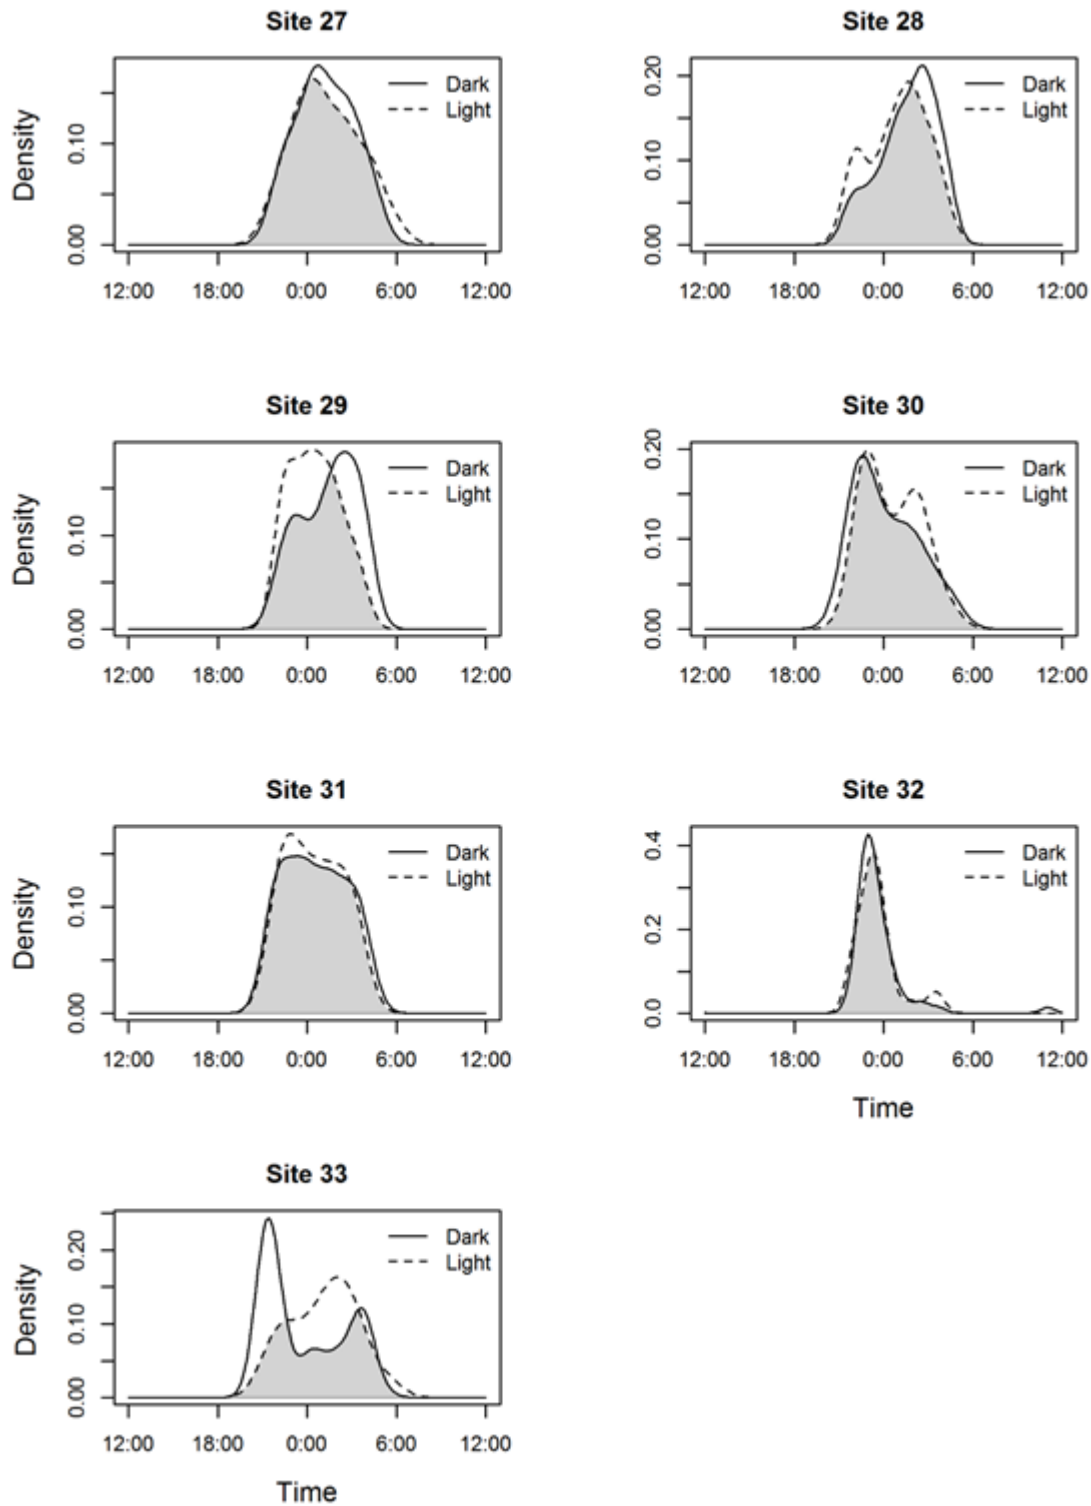

**Figure S2.** Activity patterns of hedgehogs, expressed as a kernel density, at each of the 31 sites in the week where the light was on (dashed line) and when the light was off (solid line). The area shaded in grey is where the two activity patterns overlap ( $\Delta$ ). Sites 1 and 14 were removed due to small sample sizes ( $n < 10$ ).
